# Supplementary material for: Comparative Effectiveness of Western and Eastern Manual Therapies for Chronic Obstructive Pulmonary Disease: A Systematic Review and Network Meta-Analysis
Source: MDPI journal article supplement (doi:10.3390/healthcare9091127), 2021-08-30

## Supplement S3. Results of pairwise meta-analysis

### 1. FEV1 (L)

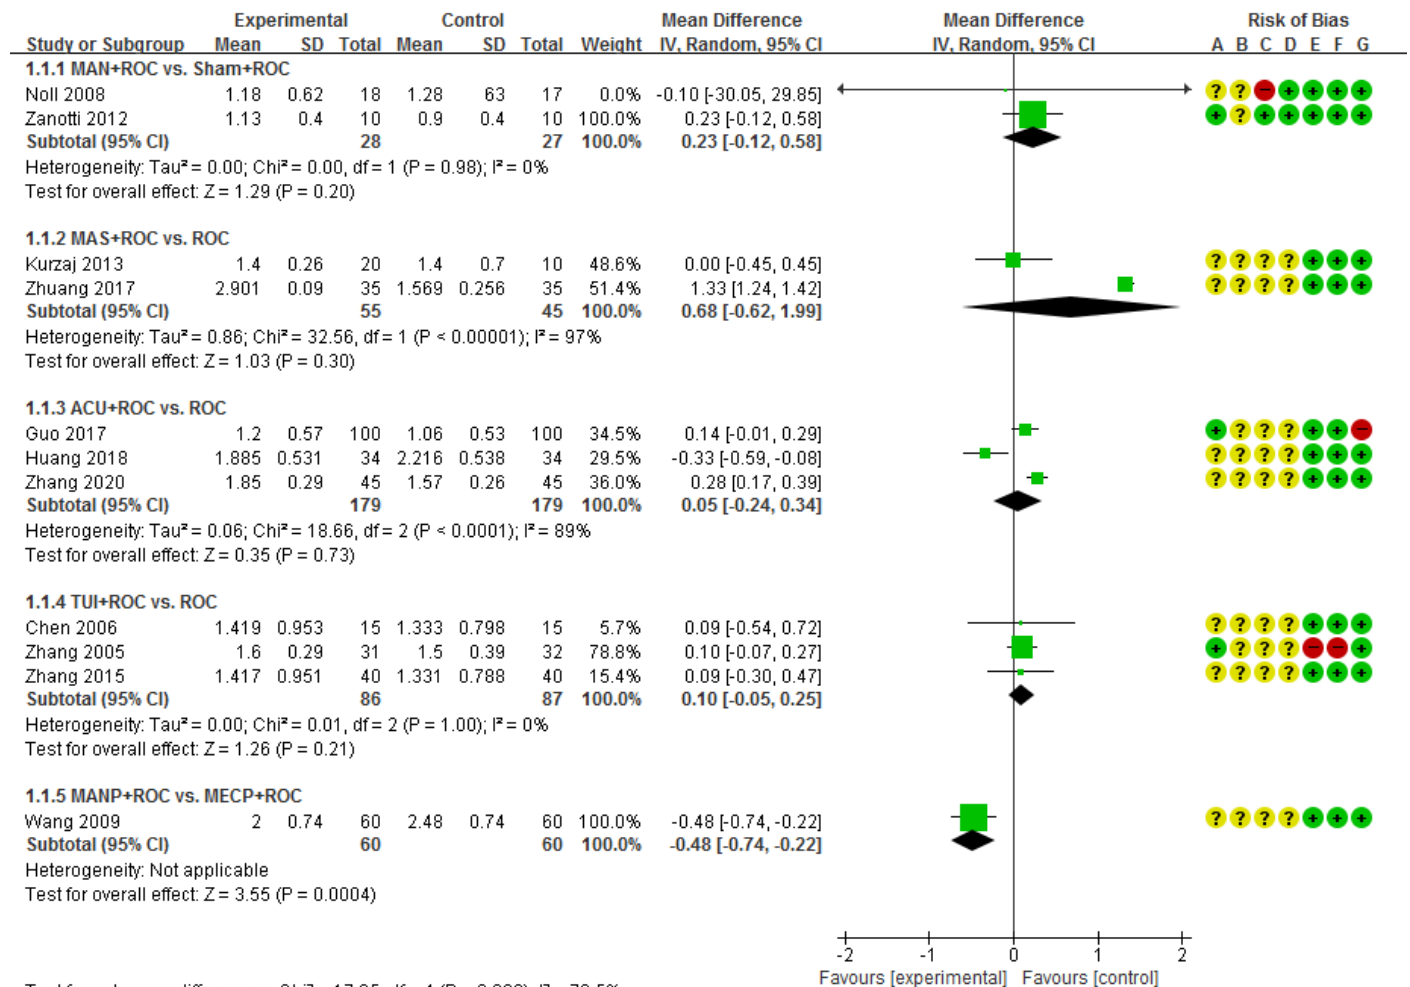

## 2. FVC (L)

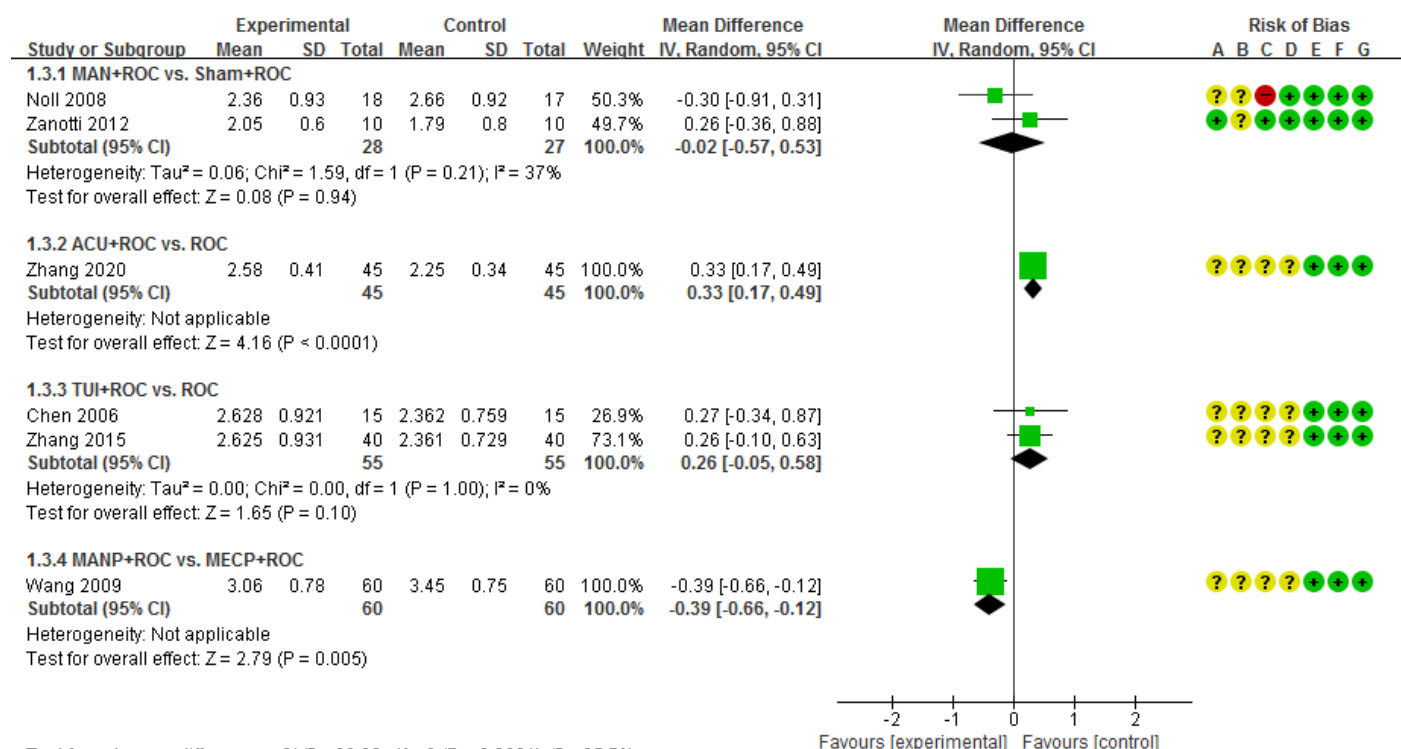

### 3. FEV1/FVC (%)

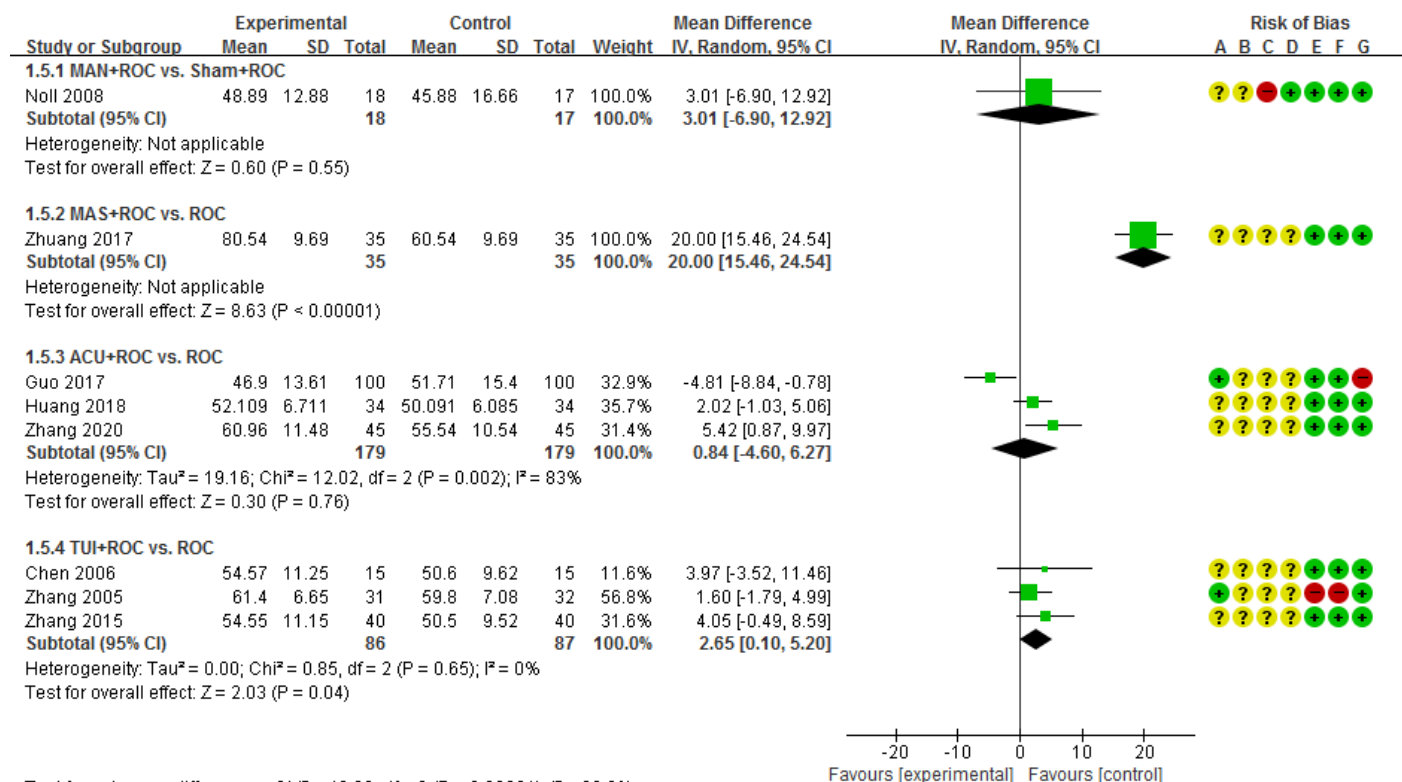

#### 4. 6MWD (m)

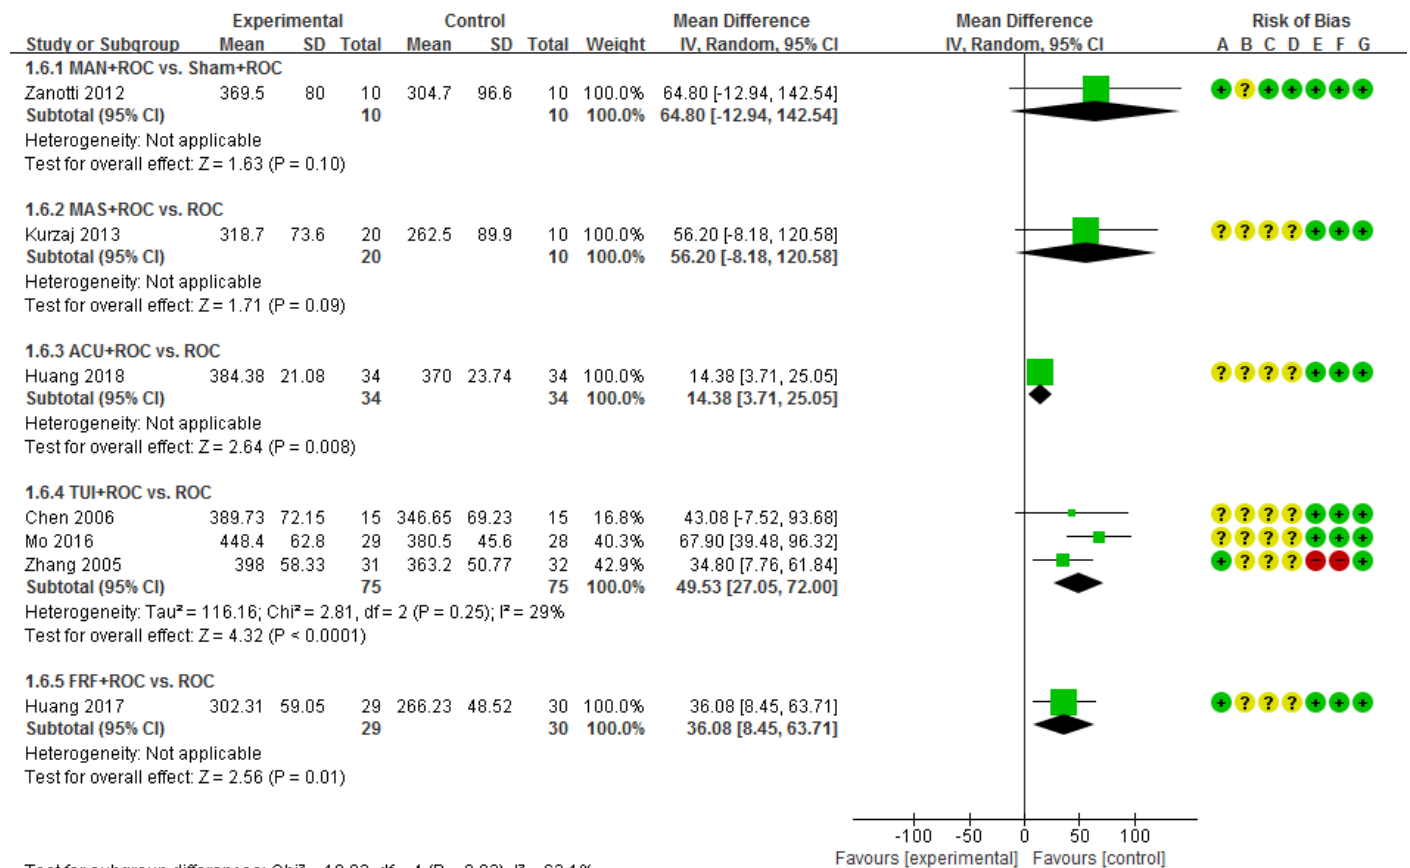

Test for subgroup differences: Chi<sup>2</sup> = 10.83, df = 4 (P = 0.03), I<sup>2</sup> = 63.1%

#### Risk of bias legend

- (A) Random sequence generation (selection bias)
- (B) Allocation concealment (selection bias)
- (C) Blinding of participants and personnel (performance bias)
- (D) Blinding of outcome assessment (detection bias)
- (E) Incomplete outcome data (attrition bias)
- (F) Selective reporting (reporting bias)
- (G) Other bias

## 5. TER (respiratory symptom)

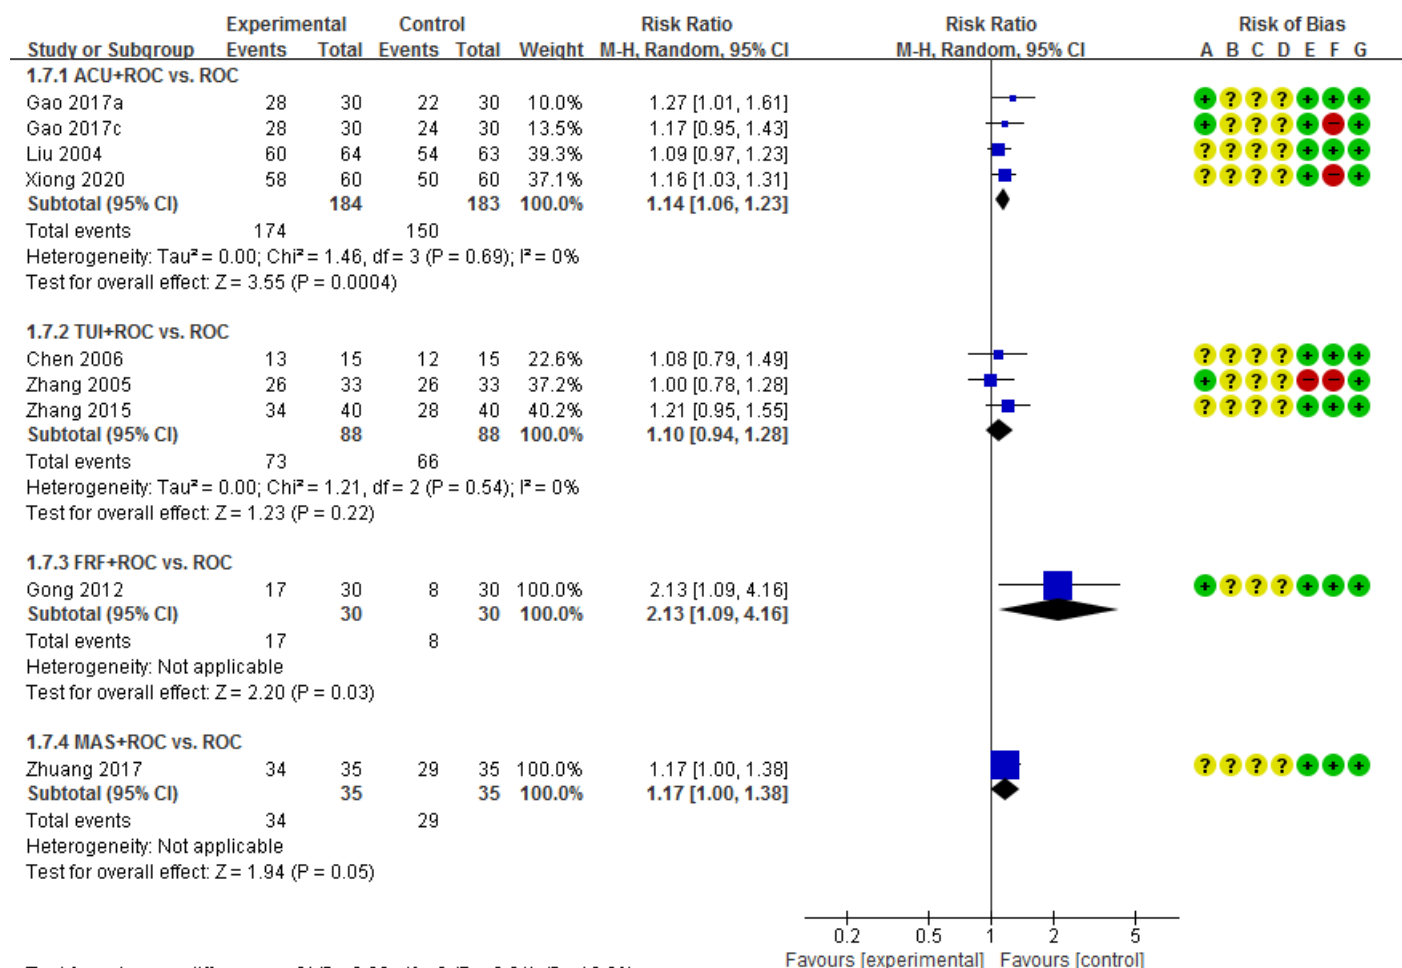

## 6. Sputum secretion (mL)

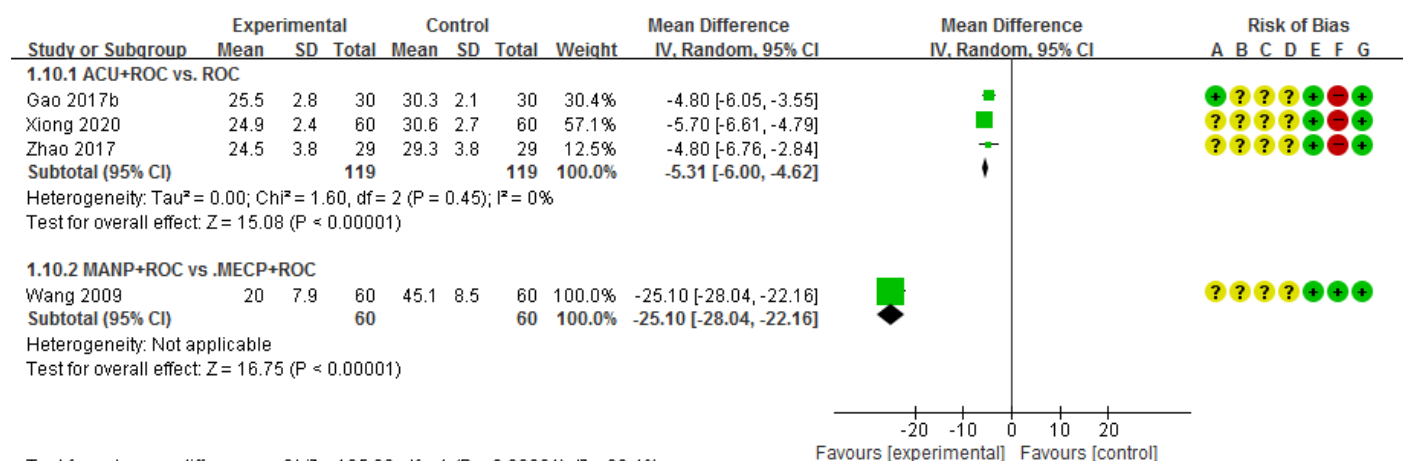

### Risk of bias legend

- (A) Random sequence generation (selection bias)
- (B) Allocation concealment (selection bias)
- (C) Blinding of participants and personnel (performance bias)
- (D) Blinding of outcome assessment (detection bias)
- (E) Incomplete outcome data (attrition bias)
- (F) Selective reporting (reporting bias)
- (G) Other bias

## 7. SpO2 (%)

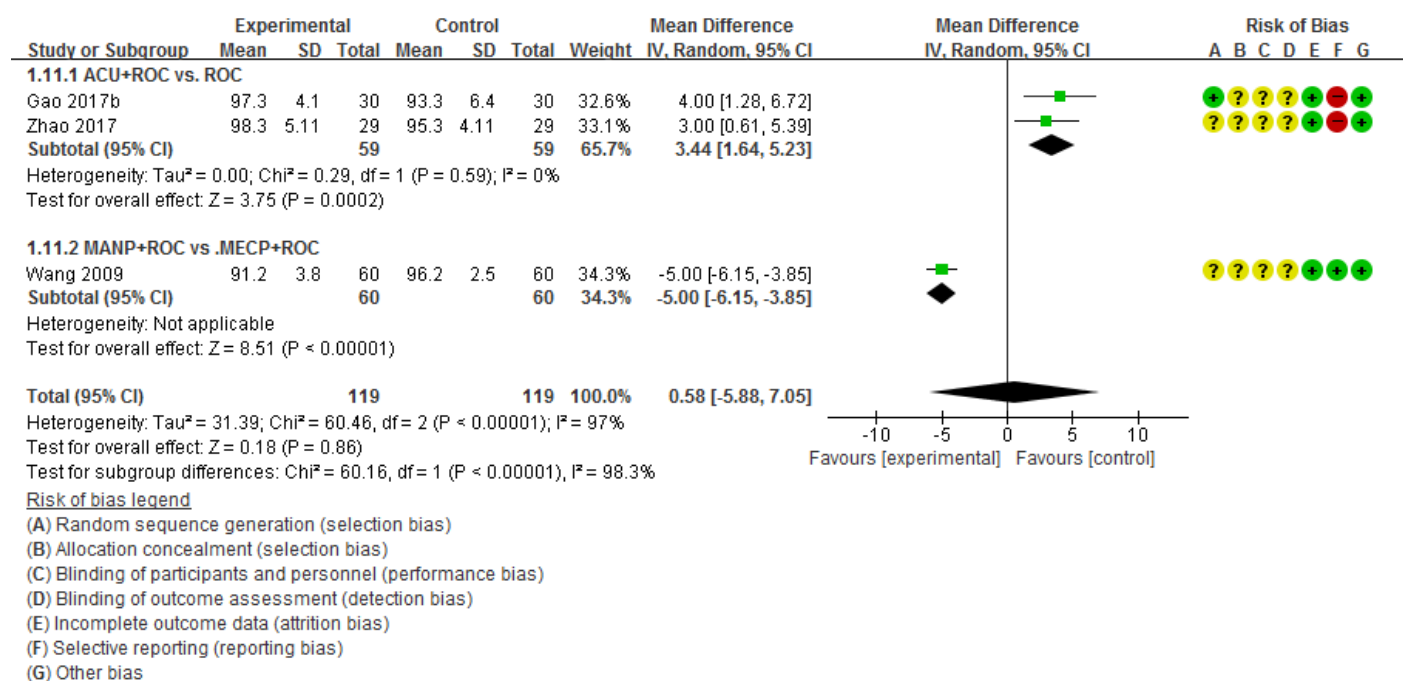

## 8. PaO2 (mmHg)

| Study or Subgroup                                                                                             | Experimental |      |       | Control |       |       | Weight | Mean Difference<br>IV, Random, 95% CI | Mean Difference<br>IV, Random, 95% CI | Risk of Bias |   |   |   |   |   |   |  |  |
|---------------------------------------------------------------------------------------------------------------|--------------|------|-------|---------|-------|-------|--------|---------------------------------------|---------------------------------------|--------------|---|---|---|---|---|---|--|--|
|                                                                                                               | Mean         | SD   | Total | Mean    | SD    | Total |        |                                       |                                       | A            | B | C | D | E | F | G |  |  |
| 1.12.1 ACU+ROC vs. ROC                                                                                        |              |      |       |         |       |       |        |                                       |                                       |              |   |   |   |   |   |   |  |  |
| Gao 2017a                                                                                                     | 86.78        | 9.08 | 30    | 67.36   | 7.58  | 30    | 18.9%  | 19.42 [15.19, 23.65]                  |                                       | +            | ? | ? | ? | + | + | + |  |  |
| Gao 2017b                                                                                                     | 80.8         | 5.14 | 30    | 65.34   | 5.53  | 30    | 21.3%  | 15.46 [12.76, 18.16]                  |                                       | +            | ? | ? | ? | + | + | + |  |  |
| Gao 2017c                                                                                                     | 80.8         | 2.16 | 30    | 71.38   | 1.24  | 30    | 23.1%  | 9.42 [8.53, 10.31]                    |                                       | +            | ? | ? | ? | + | + | + |  |  |
| Liu 2004                                                                                                      | 68.78        | 18.6 | 64    | 62.56   | 16.95 | 63    | 15.5%  | 6.22 [0.03, 12.41]                    |                                       | ?            | ? | ? | ? | + | + | + |  |  |
| Zhao 2017                                                                                                     | 80.7         | 5.24 | 29    | 65.24   | 5.63  | 29    | 21.2%  | 15.46 [12.66, 18.26]                  |                                       | ?            | ? | ? | ? | + | + | + |  |  |
| Subtotal (95% CI)                                                                                             |              |      | 183   |         |       | 182   | 100.0% | 13.38 [9.16, 17.60]                   |                                       |              |   |   |   |   |   |   |  |  |
| Heterogeneity: Tau <sup>2</sup> = 19.84; Chi <sup>2</sup> = 49.27, df = 4 (P < 0.00001); I <sup>2</sup> = 92% |              |      |       |         |       |       |        |                                       |                                       |              |   |   |   |   |   |   |  |  |
| Test for overall effect: Z = 6.22 (P < 0.00001)                                                               |              |      |       |         |       |       |        |                                       |                                       |              |   |   |   |   |   |   |  |  |

-20 -10 0 10 20  
Favours [experimental] Favours [control]

Test for subgroup differences: Not applicable

### Risk of bias legend

- (A) Random sequence generation (selection bias)
- (B) Allocation concealment (selection bias)
- (C) Blinding of participants and personnel (performance bias)
- (D) Blinding of outcome assessment (detection bias)
- (E) Incomplete outcome data (attrition bias)
- (F) Selective reporting (reporting bias)
- (G) Other bias



## 9. PaCO<sub>2</sub> (mmHg)

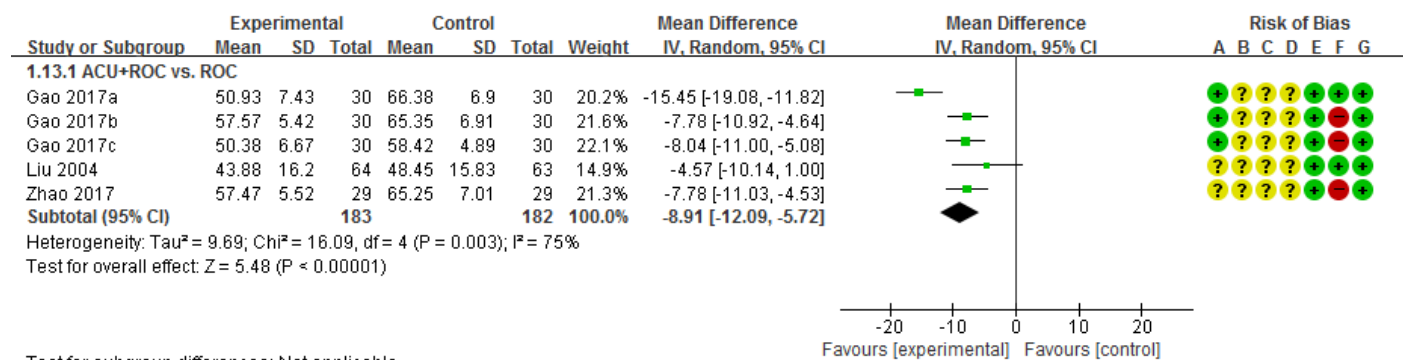

Test for subgroup differences: Not applicable

### Risk of bias legend

- (A) Random sequence generation (selection bias)
- (B) Allocation concealment (selection bias)
- (C) Blinding of participants and personnel (performance bias)
- (D) Blinding of outcome assessment (detection bias)
- (E) Incomplete outcome data (attrition bias)
- (F) Selective reporting (reporting bias)
- (G) Other bias

## 10. SaO2 (%)

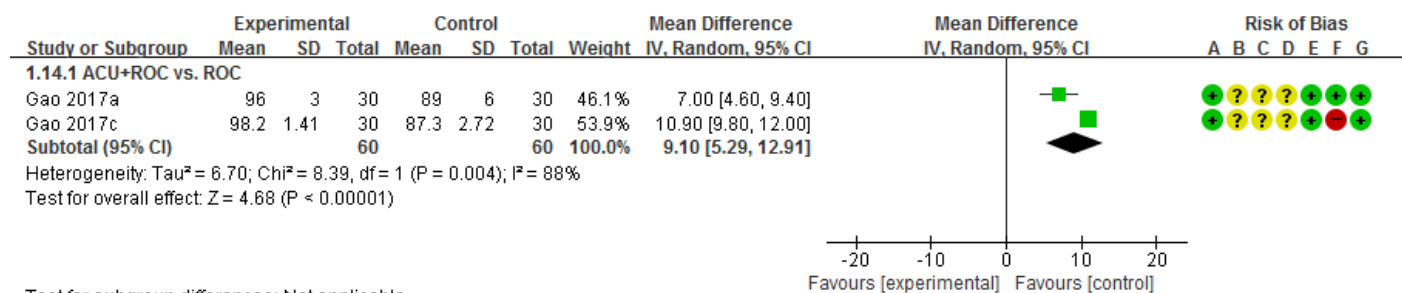

### Risk of bias legend

- (A) Random sequence generation (selection bias)
- (B) Allocation concealment (selection bias)
- (C) Blinding of participants and personnel (performance bias)
- (D) Blinding of outcome assessment (detection bias)
- (E) Incomplete outcome data (attrition bias)
- (F) Selective reporting (reporting bias)
- (G) Other bias

## 11. Adverse events (incidence)

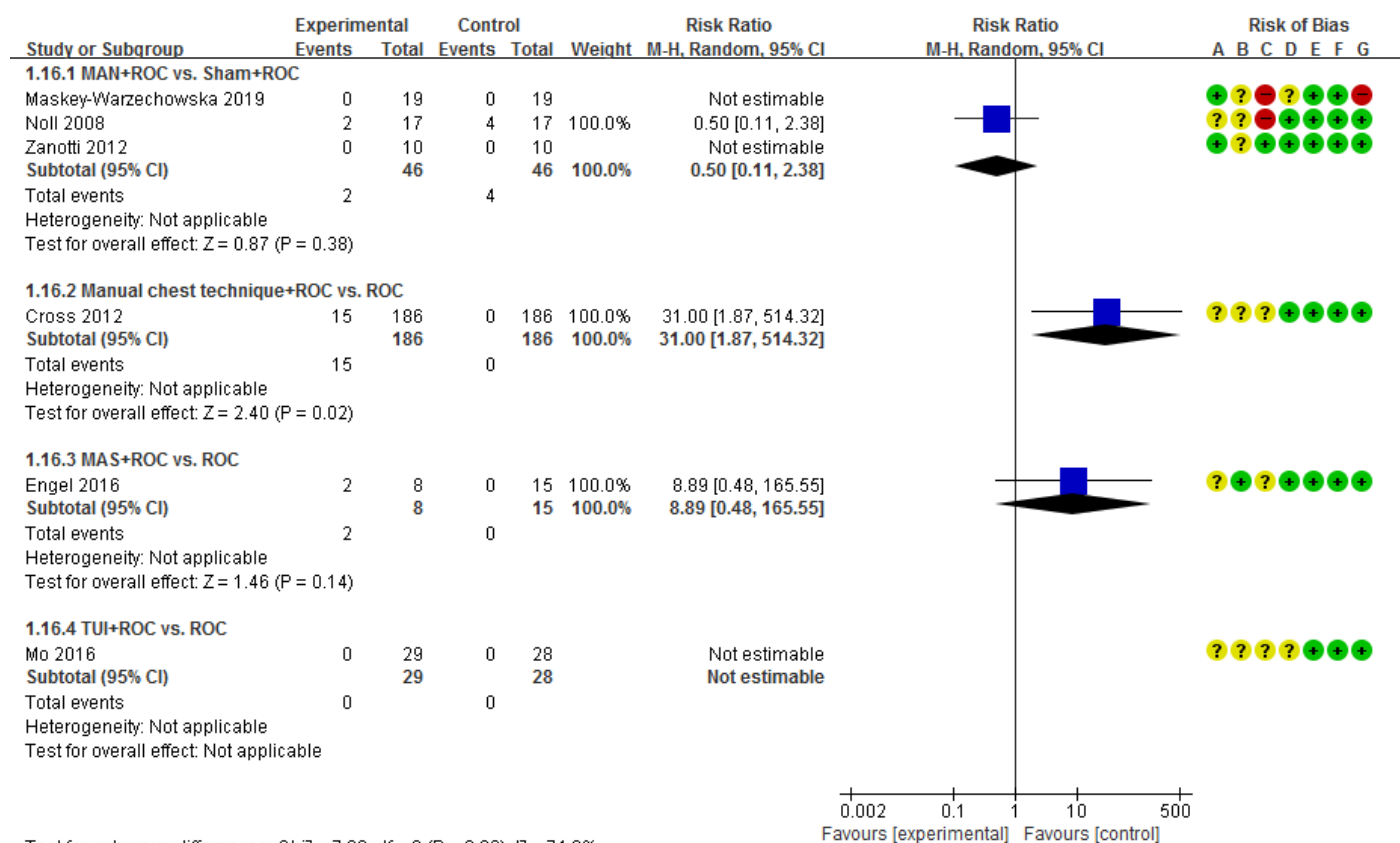

Supplement: s1 [file s1]
