# Supplementary material for: Comparative Effectiveness of Western and Eastern Manual Therapies for Chronic Obstructive Pulmonary Disease: A Systematic Review and Network Meta-Analysis
Source: MDPI journal article supplement (doi:10.3390/healthcare9091127), 2021-08-30
Supplement: s1 [file s1]

## Supplement S1. Search terms used in each

### database Medline via PubMed

|    | Searches                                                                                                                                                                                                                                                                                                                                                                                                                | Results   |
|----|-------------------------------------------------------------------------------------------------------------------------------------------------------------------------------------------------------------------------------------------------------------------------------------------------------------------------------------------------------------------------------------------------------------------------|-----------|
| #1 | "Lung Diseases, Obstructive"[MH] OR (obstruct*[TIAB] AND (pulmonary[TIAB] OR airway*[TIAB] OR lung*[TIAB] OR airflow*[TIAB] OR bronch*[TIAB] OR respirat*[TIAB])) OR emphysema[TIAB] OR COPD[TIAB] OR COAD[TIAB] OR COBD[TIAB] OR AECB[TIAB]                                                                                                                                                                            | 301,719   |
| #2 | "Musculoskeletal Manipulations"[MH] OR Chiropractic[MH] OR "manual therapy"[TIAB] OR manipulate*[TIAB] OR "joint mobilization"[TIAB] OR "joint mobilisation"[TIAB] OR chiropract*[TIAB] OR osteopath*[TIAB] OR massage[TIAB] OR reflexology[TIAB] OR "soft tissue therapy"[TIAB] OR "Muscle Stretching Exercises"[MH] OR "muscle stretching"[TIAB] OR tuina[TIAB] OR chuna[TIAB] OR "tui na"[TIAB] OR acupressure[TIAB] | 96,927    |
| #3 | "Randomized Controlled Trial"[PT] OR "Controlled Clinical Trial"[PT] OR randomized[TIAB] OR placebo[TIAB] OR "Clinical Trials as Topic"[Mesh: noexp] OR randomly[TIAB] OR trial[TI]                                                                                                                                                                                                                                     | 1,433,018 |
| #4 | animals[MH] NOT humans[MH]                                                                                                                                                                                                                                                                                                                                                                                              | 4,788,192 |
| #5 | #1 AND #2 AND #3 NOT #4                                                                                                                                                                                                                                                                                                                                                                                                 | <b>92</b> |

### EMBASE via Elsevier

|    | Searches                                                                                                                                                                                                                                                                                                                                                                                                                                                                                                                                                                                   | Results    |
|----|--------------------------------------------------------------------------------------------------------------------------------------------------------------------------------------------------------------------------------------------------------------------------------------------------------------------------------------------------------------------------------------------------------------------------------------------------------------------------------------------------------------------------------------------------------------------------------------------|------------|
| #1 | 'chronic obstructive lung disease'/exp OR 'chronic obstructive lung disease':ab,ti OR (obstruct*:ab,ti AND (pulmonary:ab,ti OR airway*:ab,ti OR lung*:ab,ti OR airflow*:ab,ti OR bronch*:ab,ti OR respirat*:ab,ti)) OR emphysema/exp OR emphysema:ab,ti OR COPD:ab,ti OR COAD:ab,ti OR COBD:ab,ti OR AECB:ab,ti                                                                                                                                                                                                                                                                            | 302,585    |
| #2 | 'musculoskeletal manipulation'/exp OR 'musculoskeletal manipulation':ab,ti OR chiropractic/exp OR chiropractic:ab,ti OR 'manipulative medicine'/exp OR 'manipulative medicine':ab,ti OR 'manual therapy':ab,ti OR 'joint mobilization'/exp OR 'joint mobili*':ab,ti OR 'osteopathic medicine'/exp OR osteopath*:ab,ti OR massage:ab,ti OR reflexology/exp OR reflexology:ab,ti OR 'soft tissue therapy':ab,ti OR 'stretching exercise'/exp OR 'muscle stretching'/exp OR 'muscle stretching':ab,ti OR tuina:ab,ti OR chuna:ab,ti OR 'tui na':ab,ti OR acupressure/exp OR acupressure:ab,ti | 62,057     |
| #3 | 'crossover procedure':de OR 'double-blind procedure':de OR 'randomized controlled trial':de OR 'single-blind procedure':de OR (random* OR factorial* OR crossover* OR cross NEXT/1 over* OR placebo* OR doubl* NEAR/1 blind* OR singl* NEAR/1 blind* OR assign* OR allocat* OR volunteer*):de,ab,ti                                                                                                                                                                                                                                                                                        | 2,698,374  |
| #4 | #1 AND #2 AND #3                                                                                                                                                                                                                                                                                                                                                                                                                                                                                                                                                                           | <b>122</b> |

## CENTRAL

|    | Searches                                                                                                                                                                                                                                       | Results    |
|----|------------------------------------------------------------------------------------------------------------------------------------------------------------------------------------------------------------------------------------------------|------------|
| #1 | MeSH descriptor: [Lung Diseases, Obstructive] explode all trees                                                                                                                                                                                | 19,769     |
| #2 | ((obstruct* AND (pulmonary OR airway* OR lung* OR airflow* OR bronch* OR respirat*)) OR emphysema OR COPD OR COAD OR COBD OR AECB):ti,ab,kw                                                                                                    | 30,528     |
| #3 | MeSH descriptor: [Musculoskeletal Manipulations] explode all trees                                                                                                                                                                             | 2,933      |
| #4 | MeSH descriptor: [Chiropractic] explode all trees                                                                                                                                                                                              | 130        |
| #5 | MeSH descriptor: [Muscle Stretching Exercises] explode all trees                                                                                                                                                                               | 609        |
| #6 | ("manual therapy" OR manipulate* OR "joint mobilization" OR "joint mobilisation" OR chiropract* OR osteopath* OR massage OR reflexology OR "soft tissue therapy" OR "muscle stretching" OR tuina OR chuna OR "tui na" OR acupressure):ti,ab,kw | 13,728     |
| #7 | ((#1 OR #2) AND (#3 OR #4 OR #5 OR #6)) in Trials                                                                                                                                                                                              | <b>133</b> |

## AMED via EBSCO

|    | Searches                                                                                                                                                                                                                                                                                                                                                                                    | Results   |
|----|---------------------------------------------------------------------------------------------------------------------------------------------------------------------------------------------------------------------------------------------------------------------------------------------------------------------------------------------------------------------------------------------|-----------|
| #1 | "Lung Diseases, Obstructive"[SU] OR (obstruct*[TX] AND (pulmonary[TX] OR airway*[TX] OR lung*[TX] OR airflow*[TX] OR bronch*[TX] OR respirat*[TX])) OR emphysema[TX] OR COPD[TX] OR COAD[TX] OR COBD[TX] OR AECB[TX]                                                                                                                                                                        | 2,536     |
| #2 | "Musculoskeletal Manipulations"[SU] OR Chiropractic[SU] OR "manual therapy"[TX] OR manipulate*[TX] OR "joint mobilization"[TX] OR "joint mobilisation"[TX] OR chiropract*[TX] OR osteopath*[TX] OR massage[TX] OR reflexology[TX] OR "soft tissue therapy"[TX] OR "Muscle Stretching Exercises"[SU] OR "muscle stretching"[TX] OR tuina[TX] OR chuna[TX] OR "tui na"[TX] OR acupressure[TX] | 19,626    |
| #3 | #1 AND #2                                                                                                                                                                                                                                                                                                                                                                                   | <b>60</b> |

## KISS

|    | Searches                                                                | Results  |
|----|-------------------------------------------------------------------------|----------|
| #1 | (COPD OR 만성 폐쇄성 폐질환) AND (수기요법 OR 관절가동술 OR chiropractic OR 마사지 OR 반사요법) | 0        |
| #2 | (COPD OR 만성 폐쇄성 폐질환) AND (근육스트레칭 OR 추나 OR 지압)                           | 0        |
| #3 | #1 OR #2                                                                | <b>0</b> |

## KCI

|    | Searches                                                | Results |
|----|---------------------------------------------------------|---------|
| #1 | (COPD OR 만성 폐쇄성 폐질환)AND (수기요법 OR 관절가동술 OR chiropractic) | 0       |
| #2 | (COPD OR 만성 폐쇄성 폐질환)AND (마사지 OR 반사요법 OR 근육스트레칭)         | 0       |
| #3 | (COPD OR 만성 폐쇄성 폐질환)AND (추나 OR 지압)                      | 0       |
| #4 | #1 OR #2 OR #3                                          | 0       |

## CNKI

|    | Searches                                                                                                                                                                                                                   | Results |
|----|----------------------------------------------------------------------------------------------------------------------------------------------------------------------------------------------------------------------------|---------|
| #1 | (SU='COPD'+ '慢性阻塞性肺疾病'+ '慢性阻塞性肺病'+ '慢性阻塞性肺'+ '肺气肿'+ '慢性支气管炎'+ '慢性气管炎'+ '慢阻肺疾病'+ '慢阻肺病'+ '慢阻肺') AND (SU='手法治疗'+ '推拿'+ '理疗'+ '按摩'+ '物理疗法'+ '捏脊'+ '正骨'+ '整骨'+ '整脊'+ '理筋'+ '反射疗法'+ '肌肉能量技术'+ '等距'+ '关节松动'+ '筋膜松动'+ '贴压'+ '敷贴') | 385     |

## Wanfang data

|    | Searches                                                                                                                                                                                                                                                                                          | Results |
|----|---------------------------------------------------------------------------------------------------------------------------------------------------------------------------------------------------------------------------------------------------------------------------------------------------|---------|
| #1 | (主题:COPD or 主题:慢性阻塞性肺疾病 or 主题:慢性阻塞性肺病 or 主题:慢性阻塞性肺 or 主题:肺气肿 or 主题:慢性支气管炎 or 主题:慢性气管炎 or 主题:慢阻肺疾病 or 主题:慢阻肺病 or 主题:慢阻肺) AND (主题:手法治疗 or 主题:推拿 or 主题:理疗 or 主题:按摩 or 主题:物理疗法 or 主题:捏脊 or 主题:正骨 or 主题:整骨 or 主题:整脊 or 主题:理筋 or 主题:反射疗法 or 主题:肌肉能量技术 or 主题:等距 or 主题:关节松动 or 主题:筋膜松动 or 主题:贴压 or 主题:敷贴) | 1382    |

## VIP.

|    | Searches                                                                                                                                 | Results |
|----|------------------------------------------------------------------------------------------------------------------------------------------|---------|
| #1 | (M=(COPD OR 慢性阻塞性肺疾病 OR 慢性阻塞性肺病 OR 慢性阻塞性肺 OR 肺气肿 OR 慢性支气管炎 OR 慢性气管炎 OR 慢阻肺疾病 OR 慢阻肺病 OR 慢阻肺) AND M=(手法治疗 OR 推拿 OR 理疗 OR 按摩 OR 物理疗法 OR 捏脊 | 449     |

|  |                                                                               |  |
|--|-------------------------------------------------------------------------------|--|
|  | OR 正骨 OR 整骨 OR 整脊 OR 理筋 OR 反射疗法 OR 肌肉能量技术 OR 等距 OR 关节松动 OR 筋膜松动 OR 贴压 OR 敷贴)) |  |
|--|-------------------------------------------------------------------------------|--|
