# Supplementary material for: Comparative Effectiveness of Western and Eastern Manual Therapies for Chronic Obstructive Pulmonary Disease: A Systematic Review and Network Meta-Analysis
Source: Healthcare (Basel). 2021 Aug 30;9(9):1127. doi: 10.3390/healthcare9091127 (PMC8467771; doi:10.3390/healthcare9091127)
Supplement: Supplementary file 1 [file healthcare-09-01127-s001.zip]

Archive with 4 entries (4 files):
- Supplement S1.pdf
- Supplement S2.pdf
- Supplement S3_revised.pdf
- Supplement S4.pdf
